# Supplementary material for: Metabolic Profiling of Nine Mentha Species and Prediction of Their Antioxidant Properties Using Chemometrics
Source: PubMed Central journal article supplement (PMC6359624; doi:10.3390/molecules24020258), 2019-01-11

**Table 1.** Gas chromatographic and mass spectrometric data of the identified hydrophilic compounds.

| Compound             | RT <sup>a</sup> | RRT <sup>b</sup> | RI <sup>c</sup> | Quantification ion <sup>d</sup> | Other characteristic ions |
|----------------------|-----------------|------------------|-----------------|---------------------------------|---------------------------|
| <i>Amino acids</i>   |                 |                  |                 |                                 |                           |
| Alanine              | 9.109           | 0.499            | 1106            | 190                             | 218, 147, 116             |
| Valine               | 11.133          | 0.610            | 1222            | 218                             | 156, 144, 133             |
| Leucine              | 12.033          | 0.659            | 1278            | 158                             | 232, 218, 102             |
| Isoleucine           | 12.401          | 0.679            | 1301            | 158                             | 232, 218, 147             |
| Proline              | 12.475          | 0.683            | 1306            | 216                             | 244, 147, 142             |
| Glycine              | 12.623          | 0.691            | 1316            | 248                             | 276, 174, 147             |
| Serine               | 13.376          | 0.733            | 1367            | 306                             | 278, 218, 204             |
| Threonine            | 13.804          | 0.756            | 1396            | 291                             | 218, 147, 117             |
| β-Alanine            | 14.355          | 0.786            | 1436            | 174                             | 290, 248, 147             |
| Aspartic acid        | 15.594          | 0.854            | 1529            | 334                             | 306, 232, 188             |
| Methionine           | 15.606          | 0.855            | 1530            | 293                             | 250, 176, 128             |
| 4-Aminobutyric acid  | 15.746          | 0.863            | 1541            | 304                             | 216, 174, 147             |
| Pyroglutamic acid    | 15.703          | 0.860            | 0               | 156                             | 258, 230, 147             |
| Glutamic acid        | 16.83           | 0.922            | 1628            | 363                             | 348, 246, 128             |
| Phenylalanine        | 16.997          | 0.931            | 1642            | 218                             | 266, 192, 141             |
| Asparagine           | 17.474          | 0.957            | 1682            | 348                             | 333, 231, 116             |
| Glutamine            | 18.652          | 1.022            | 1785            | 362                             | 347, 245, 156             |
| Tryptophan           | 23.267          | 1.275            | 2251            | 202                             | 377, 291, 218             |
| <i>Organic acids</i> |                 |                  |                 |                                 |                           |
| Pyruvic acid         | 7.974           | 0.437            | 1047            | 174                             | 158, 131, 115             |
| Lactic acid          | 8.246           | 0.452            | 1061            | 219                             | 191, 147, 117             |
| Caproic acid         | 8.44            | 0.462            | 1071            | 173                             | 145, 131, 117             |
| Glycolic acid        | 8.498           | 0.466            | 1074            | 205                             | 177, 147, 133             |
| Pyruvic acid         | 8.828           | 0.484            | 1091            | 217                             | 189, 147, 131             |
| Oxalic acid          | 9.518           | 0.521            | 1129            | 219                             | 190, 147, 133             |
| Glycolic acid        | 10.789          | 0.591            | 1203            | 147                             | 177, 205, 233             |
| Benzoic acid         | 11.615          | 0.636            | 1252            | 179                             | 194, 135, 105             |
| Phosphoric acid      | 12.065          | 0.661            | 1280            | 314                             | 299, 283, 207             |
| Nicotinic acid       | 12.44           | 0.681            | 1304            | 180                             | 195, 136, 106             |

|                         |        |       |      |     |               |
|-------------------------|--------|-------|------|-----|---------------|
| Succinic acid           | 12.579 | 0.689 | 1313 | 247 | 172, 147, 129 |
| Glyceric acid           | 12.963 | 0.710 | 1339 | 292 | 220, 189, 147 |
| Fumaric acid            | 13.051 | 0.715 | 1345 | 245 | 217, 147, 115 |
| Malic acid              | 15.17  | 0.831 | 1496 | 233 | 189, 147, 160 |
| Threonic acid           | 16.166 | 0.886 | 1574 | 292 | 220, 205, 147 |
| Shikimic acid           | 19.026 | 1.042 | 1819 | 372 | 357, 204, 147 |
| Citric acid             | 19.24  | 1.054 | 1839 | 363 | 347, 273, 147 |
| Isocitric acid          | 19.24  | 1.054 | 1839 | 465 | 375, 273, 147 |
| Quinic acid             | 19.725 | 1.081 | 1884 | 345 | 255, 204, 147 |
| <i>p</i> -Coumaric acid | 21.413 | 1.173 | 0    | 219 | 308, 293, 249 |

#### *Sugars*

|           |        |       |      |     |               |
|-----------|--------|-------|------|-----|---------------|
| Xylose    | 17.402 | 0.953 | 1676 | 307 | 277, 217, 103 |
| Galactose | 19.079 | 1.045 | 1824 | 217 | 243, 204, 147 |
| Fructose  | 19.936 | 1.092 | 1904 | 307 | 277, 217, 103 |
| Fructose  | 20.017 | 1.097 | 1912 | 307 | 277, 217, 103 |
| Glucose   | 20.2   | 1.107 | 1930 | 319 | 217, 205, 147 |
| Mannose   | 20.271 | 1.110 | 1937 | 319 | 217, 205, 147 |
| Glucose   | 20.413 | 1.118 | 1951 | 319 | 217, 205, 147 |
| Glucose   | 20.931 | 1.147 | 2002 | 204 | 217, 191, 147 |
| Sucrose   | 27.047 | 1.482 | 2705 | 437 | 361, 217, 147 |
| Trehalose | 28.068 | 1.538 | 2812 | 361 | 271, 217, 191 |

#### *Sugar alcohols*

|          |        |       |      |     |               |
|----------|--------|-------|------|-----|---------------|
| Glycerol | 12.049 | 0.660 | 1279 | 218 | 205, 147, 117 |
| Ribitol  | 18.255 | 1.000 | 1750 | 319 | 307, 217, 147 |
| Mannitol | 20.566 | 1.127 | 1966 | 319 | 205, 117, 103 |
| Inositol | 22.186 | 1.215 | 2132 | 318 | 305, 217, 147 |

#### *Amine*

|              |        |       |      |     |               |
|--------------|--------|-------|------|-----|---------------|
| Ethanolamine | 11.428 | 0.626 | 1241 | 174 | 188, 147, 100 |
|--------------|--------|-------|------|-----|---------------|

---

<sup>a</sup> Retention time (min). <sup>b</sup> Relative retention times (retention time of analyte/retention time of ribitol). <sup>c</sup> Retention index. <sup>d</sup> Specific mass ion for quantification.

**Figure S1.** Total ion chromatogram (TIC) of hydrophilic compounds in apple mint. Peak: (1) Pyruvic acid-1; (2) Lactic acid; (3) Caproic acid; (4) Glycolic acid; (5) Pyruvic acid-2; (6) Alanine; (7) Oxalic acid; (8) Glycolic acid; (9) Valine; (10) Urea; (11) Ethanolamine; (12) Benzoic acid; (13) Glycerol; (14) Leucine; (15) Phosphoric acid; (16) Isoleucine; (17) Nicotinic acid; (18) Proline; (19) Succinic acid; (20) Glycine; (21) Glyceric acid; (22) Fumaric acid; (23) Serine; (24) Threonine; (25)  $\beta$ -Alanine; (26) Malic acid; (27) Aspartic acid; (28) Methionine; (29) Pyroglutamic acid; (30) 4-Aminobutyric acid; (31) Threonic acid; (32) Glutamic acid; (33) Phenylalanine; (34) Xylose; (35) Asparagine; (36) Ribitol (internal standard); (37) Glutamine; (38) Shikimic acid; (39) Citric acid; (40) Isocitric acid; (41) Galactose; (42) Quinic acid; (43) Fructose-1; (44) Fructose-2; (45) Glucose-1; (46) Mannose; (47) Glucose-2; (48) Mannitol; (49) Glucose-3; (50) p-Coumaric acid; (51) Inositol; (52) Tryptophan; (53) Sucrose; (54) Trehalose.

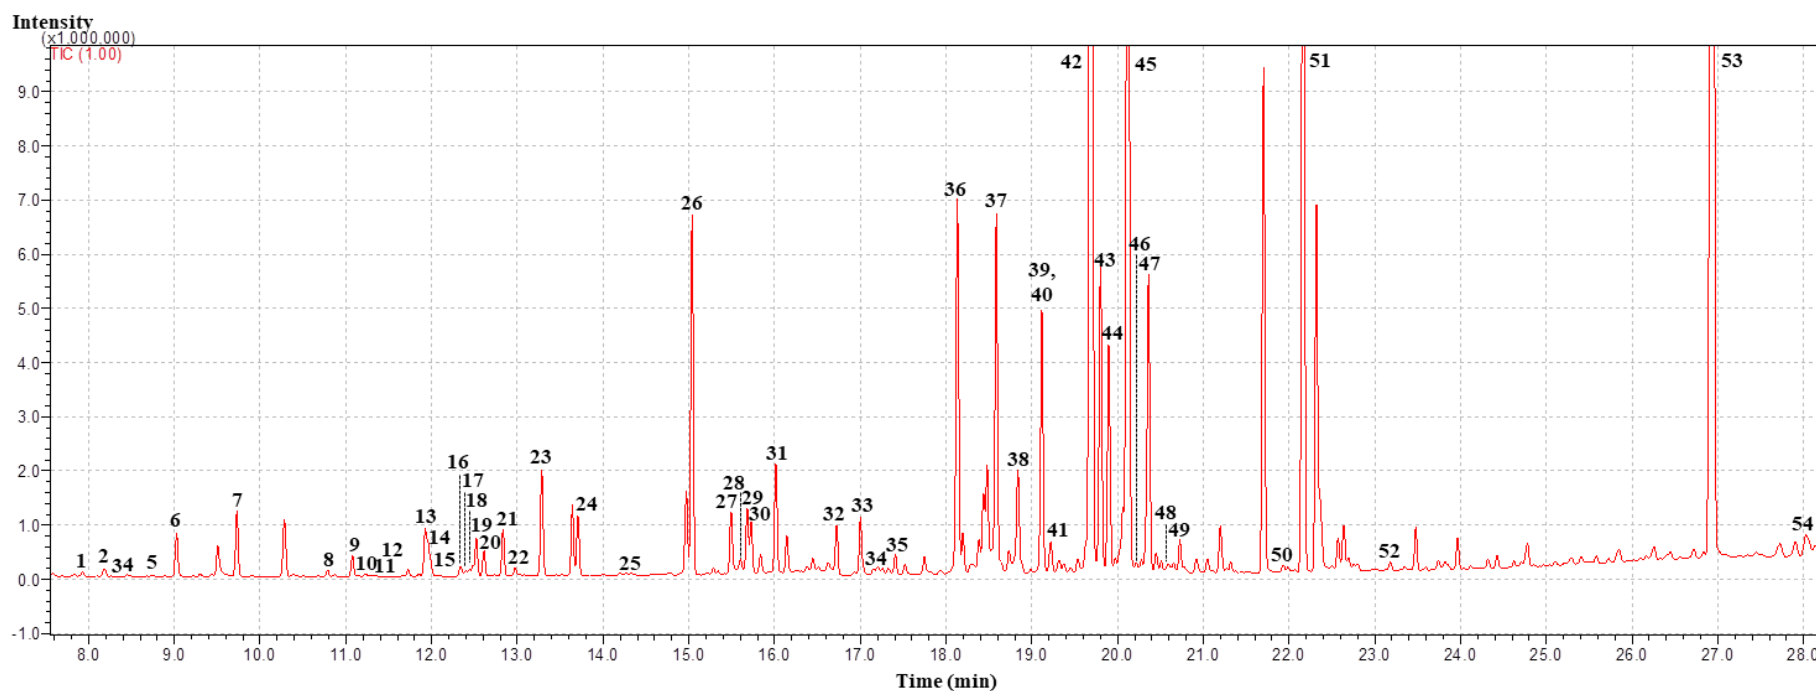

**Figure S2.** MS spectra of lipophilic compound standards. (1) C20, eicosanol (RT: 10.43 min); (2) C21, heneicosanol (RT: 10.98 min); (3) C22, docosanol (RT: 11.50 min); (4) C23, tricosanol (RT: 12.02 min) (5) C24, tetracosanol (RT: 12.49 min); (6) 5 $\alpha$ -Cholestane (internal standard; RT: 13.34 min); (7) C26, hexacosanol (RT: 13.43 min); (8)  $\beta$ -Tocopherol (RT: 13.79 min); (9)  $\gamma$ -Tocopherol (RT: 13.84 min); (10) C27, heptacosanol (RT: 13.89 min); (11) C28, octacosanol (RT: 14.40 min); (12)  $\alpha$ -Tocopherol (RT: 15.45) (13) Campesterol (RT: 15.56 min); (14) C30, triacontanol (RT: 15.59 min); (15) Stigmasterol (RT: 15.76 min); (16)  $\beta$ -Sitosterol (RT: 16.20 min); (17)  $\beta$ -Amyrin (RT: 16.47 min); (18)  $\alpha$ -Amyrin (RT: 16.79 min).

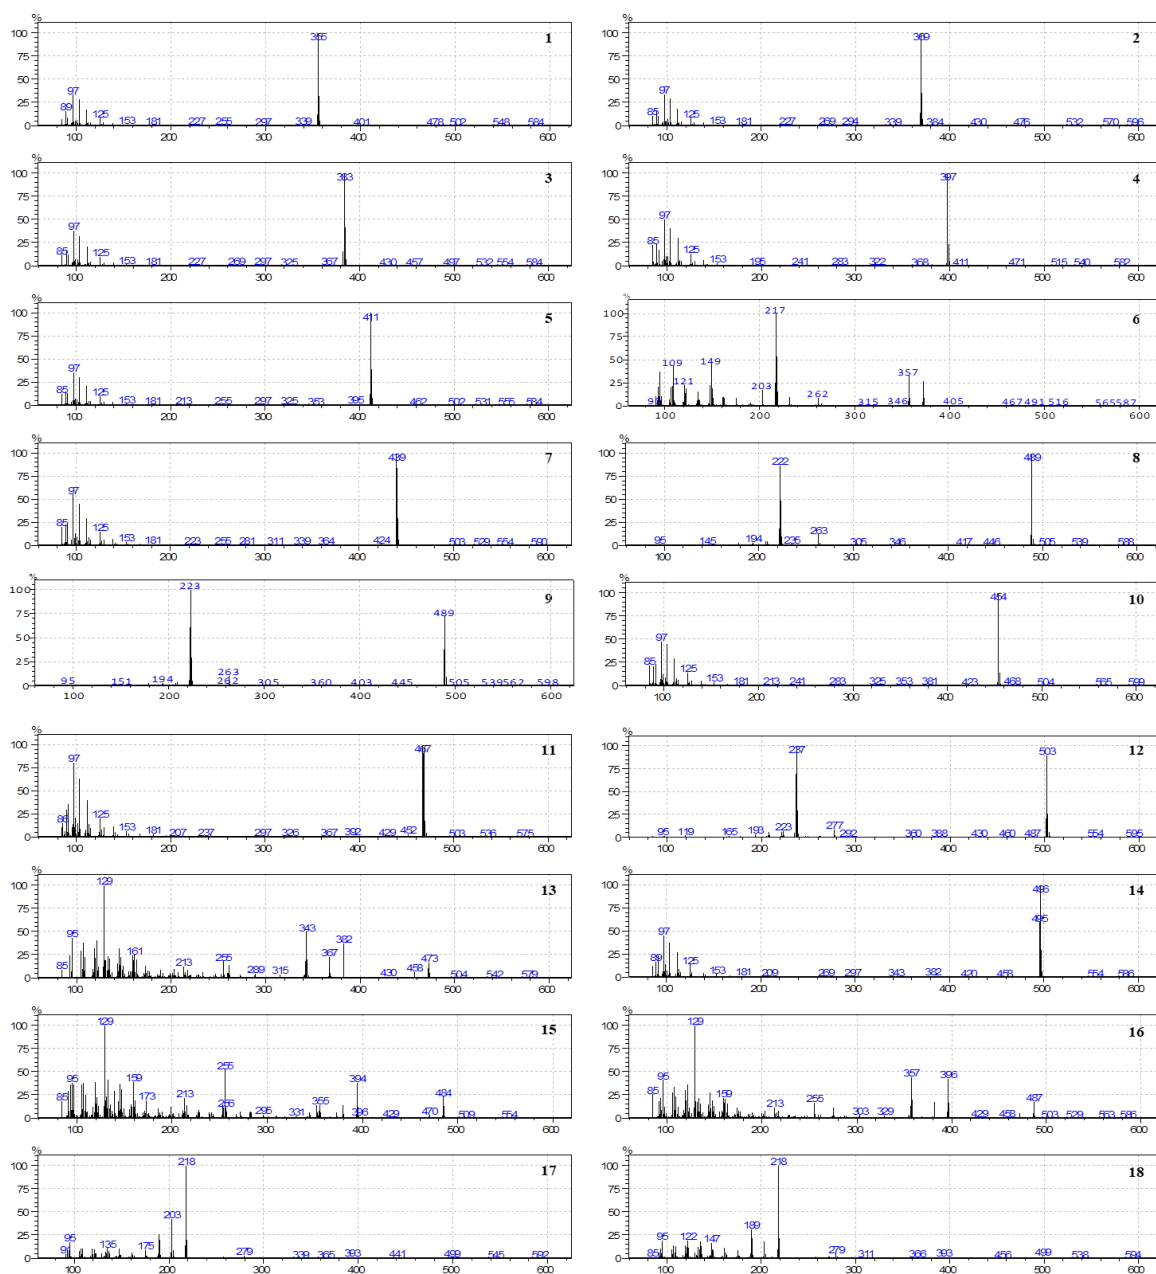

**Figure S3.** Extracted ion chromatogram (EIC) of lipophilic compounds in apple mint (AP). Peak: (1) C20, eicosanol (selected ion,  $m/z$  355); (2) C21, heneicosanol (selected ion,  $m/z$  369); (3) C22, docosanol (selected ion,  $m/z$  383); (4) C23, tricosanol (selected ion,  $m/z$  397); (5) C24, tetracosanol (selected ion,  $m/z$  411); (6) 5 $\alpha$ -colestane (selected ion,  $m/z$  217); (7) C26, hexacosanol (selected ion,  $m/z$  439); (8)  $\beta$ -tocopherol (selected ion,  $m/z$  222); (9)  $\gamma$ -tocopherol (selected ion,  $m/z$  223); (10) C27, heptacosanol (selected ion,  $m/z$  453); (11) C28, octacosanol (selected ion,  $m/z$  467); (12)  $\alpha$ -tocopherol (selected ion,  $m/z$  237); (13) campesterol (selected ion,  $m/z$  343); (14) C30, triacontanol (selected ion,  $m/z$  496); (15) stigmasterol (selected ion,  $m/z$  394); (16)  $\beta$ -sitosterol (selected ion,  $m/z$  357); (17)  $\beta$ -amyrin (selected ion,  $m/z$  218); (18)  $\alpha$ -amyrin (selected ion,  $m/z$  189).

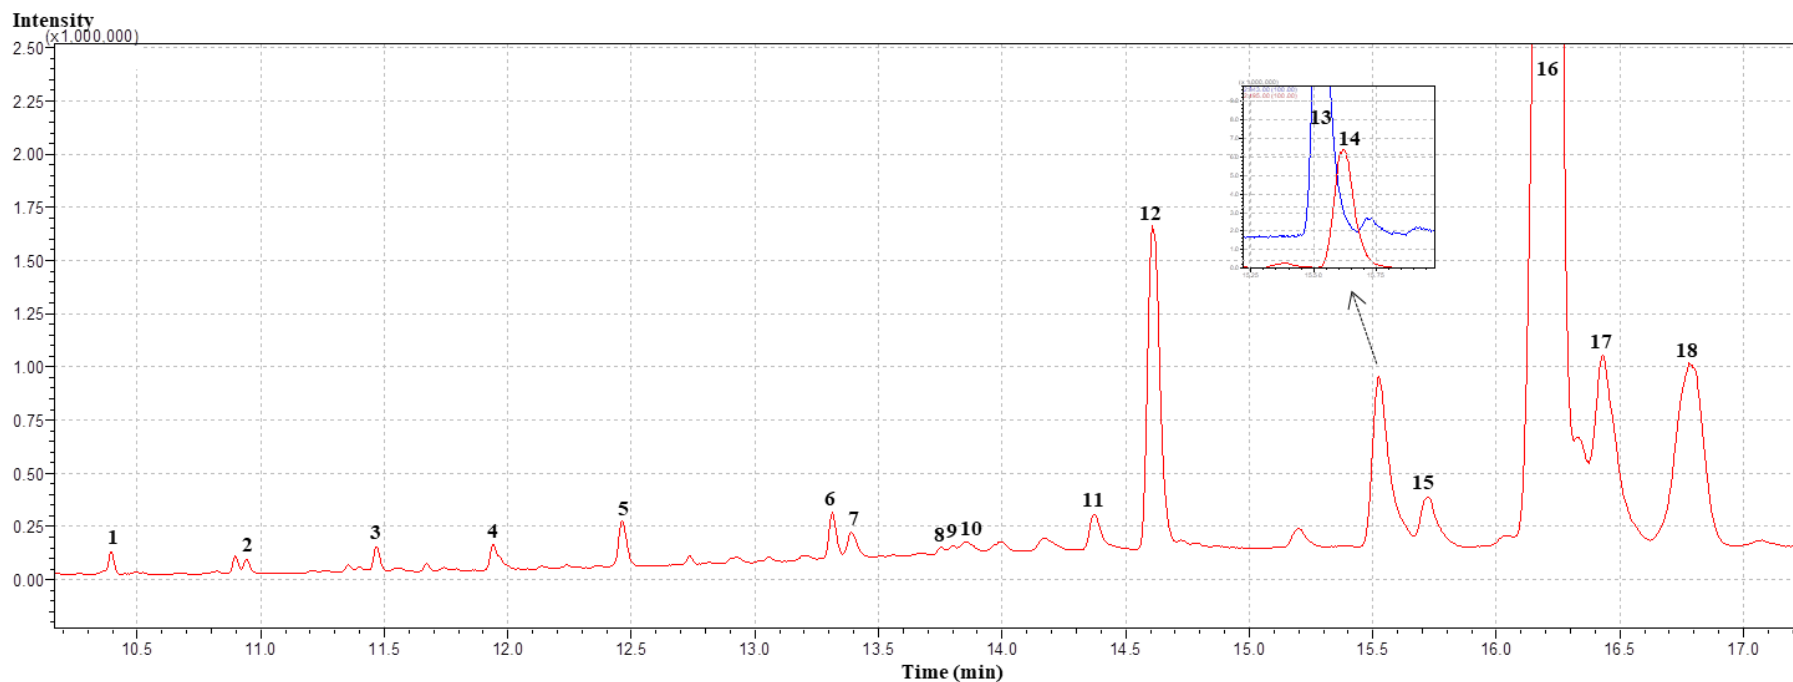

**Table S2.** Composition and abundance ( $\mu\text{g/g}$  of DW) of lipophilic compounds in nine *Mentha* species.

| Compound <sup>a</sup> | AP            | CC            | ED           | HS            | PP            | PR           | PA            | SP            | WT            |
|-----------------------|---------------|---------------|--------------|---------------|---------------|--------------|---------------|---------------|---------------|
| <i>Policosanols</i>   |               |               |              |               |               |              |               |               |               |
| C20                   | 4.15±0.23     | 3.76±0.34     | 5.10±0.26    | 6.84±0.80     | 4.69±0.59     | 7.48±0.66    | 3.53±0.19     | 3.14±0.23     | 6.05±0.48     |
| C21                   | 2.04±0.10     | 2.07±0.37     | 2.15±0.16    | 2.32±0.16     | 2.10±0.25     | 2.16±0.31    | 1.99±0.13     | 1.95±0.48     | 2.25±0.14     |
| C22                   | 9.21±0.98     | 6.72±1.52     | 7.87±0.99    | 12.13±2.18    | 7.60±1.59     | 8.68±0.86    | 8.93±0.77     | 6.11±1.71     | 11.47±2.19    |
| C23                   | 2.32±0.80     | 1.51±0.89     | 1.52±0.50    | 3.47±1.34     | 2.15±1.19     | 1.75±0.68    | 2.32±0.76     | 1.59±1.14     | 2.03±0.68     |
| C24                   | 10.20±1.19    | 4.83±0.42     | 5.02±0.22    | 12.25±2.25    | 5.65±0.37     | 5.27±0.19    | 9.57±0.72     | 4.53±0.34     | 5.36±0.12     |
| C26                   | 13.72±2.59    | 7.60±2.02     | 7.26±0.66    | 24.18±4.60    | 8.55±2.00     | 9.46±0.74    | 8.92±1.44     | 7.09±2.46     | 12.61±3.33    |
| C27                   | 7.83±2.38     | 4.78±1.30     | 5.77±0.07    | 11.95±3.43    | 5.92±1.27     | 6.00±0.64    | 6.03±0.52     | 5.70±1.34     | 6.30±1.41     |
| C28                   | 19.57±2.86    | 23.56±7.75    | 16.00±2.62   | 28.49±7.29    | 15.96±3.04    | 17.82±1.07   | 13.49±2.00    | 16.57±4.52    | 33.37±13.34   |
| C30                   | 57.22±19.00   | 48.89±21.70   | 31.01±8.40   | 19.94±6.75    | 23.78±8.34    | 13.21±2.40   | 43.56±9.83    | 12.04±4.10    | 90.54±43.19   |
| Total                 | 126.26±30.13  | 103.72±36.31  | 81.70±13.87  | 121.59±28.80  | 76.40±18.64   | 71.82±7.55   | 98.34±16.36   | 58.73±16.33   | 169.97±64.88  |
| <i>Amyrins</i>        |               |               |              |               |               |              |               |               |               |
| $\alpha$ -Amyrin      | 61.70±6.64    | 121.72±22.04  | 270.71±26.96 | 114.40±14.97  | 84.30±13.53   | 161.14±13.60 | 36.74±3.02    | 68.82±12.12   | 272.51±31.14  |
| $\beta$ -Amyrin       | 54.78±5.69    | 43.81±5.36    | 97.45±11.60  | 126.20±20.22  | 101.36±19.72  | 44.18±2.36   | 35.75±3.44    | 72.50±14.45   | 130.17±11.59  |
| <i>Sterols</i>        |               |               |              |               |               |              |               |               |               |
| Campesterol           | 188.55±22.70  | 177.24±40.67  | 129.76±19.57 | 149.47±29.88  | 112.99±22.95  | 372.87±42.25 | 181.26±19.12  | 141.32±24.13  | 151.64±32.79  |
| $\beta$ -Sitosterol   | 986.15±111.51 | 635.26±116.46 | 585.25±69.39 | 822.95±126.35 | 688.17±136.82 | 807.27±86.90 | 826.78±126.04 | 741.01±162.58 | 799.67±125.61 |
| Stigmasterol          | 59.37±9.16    | 78.48±22.03   | 102.88±12.69 | 51.14±9.82    | 72.80±14.69   | 34.73±2.90   | 70.75±14.79   | 72.58±18.87   | 116.49±21.73  |

*Tocopherols*

|                      |                |                |                |                |                |                |                |                |                |
|----------------------|----------------|----------------|----------------|----------------|----------------|----------------|----------------|----------------|----------------|
| $\alpha$ -Tocopherol | 96.02±9.37     | 71.79±7.52     | 114.04±8.86    | 141.58±11.86   | 119.23±19.50   | 69.93±3.29     | 82.10±7.15     | 76.32±11.89    | 101.79±13.66   |
| $\beta$ -Tocopherol  | 2.14±0.06      | 2.01±0.06      | 2.24±0.07      | 1.96±0.01      | 2.18±0.24      | 1.89±0.07      | 2.13±0.11      | 1.97±0.13      | 1.97±0.12      |
| $\gamma$ -Tocopherol | 2.41±0.20      | 2.09±0.28      | 2.13±0.03      | 2.33±0.12      | 3.25±0.16      | 2.78±0.13      | 2.60±0.11      | 2.86±0.28      | 2.27±0.11      |
| Total                | 1451.12±165.34 | 1132.40±214.43 | 1304.47±149.19 | 1410.03±213.23 | 1184.29±227.62 | 1494.80±151.51 | 1238.11±173.76 | 1177.38±244.45 | 1576.51±236.74 |

---

<sup>a</sup> C20, eicosanol; C21, heneicosanol; C22, docosanol; C23, tricosanol; C24, tetracosanol; C26, hexacosanol; C27, heptacosanol; C28, octacosanol; C30, triacontanol. Each value is the mean of three replications ± standard deviation. AP, apple mint; CC, chocolate mint; ED, eau de cologne mint; HS, horse mint; PP, peppermint; PR, pennyroyal mint; PA, pineapple mint; SP, spearmint; WT, water mint.

**Figure S4.** : LC chromatogram of phenolic compounds in *Mentha* species. (A) Apple mint; (B) Chocolate mint; (C) Eau de cologne mint; (D) Horse mint; (E) Peppermint; (F) Pennyroyal mint; (G) Pineapple mint; (H) Spearmint; (I) Water mint.

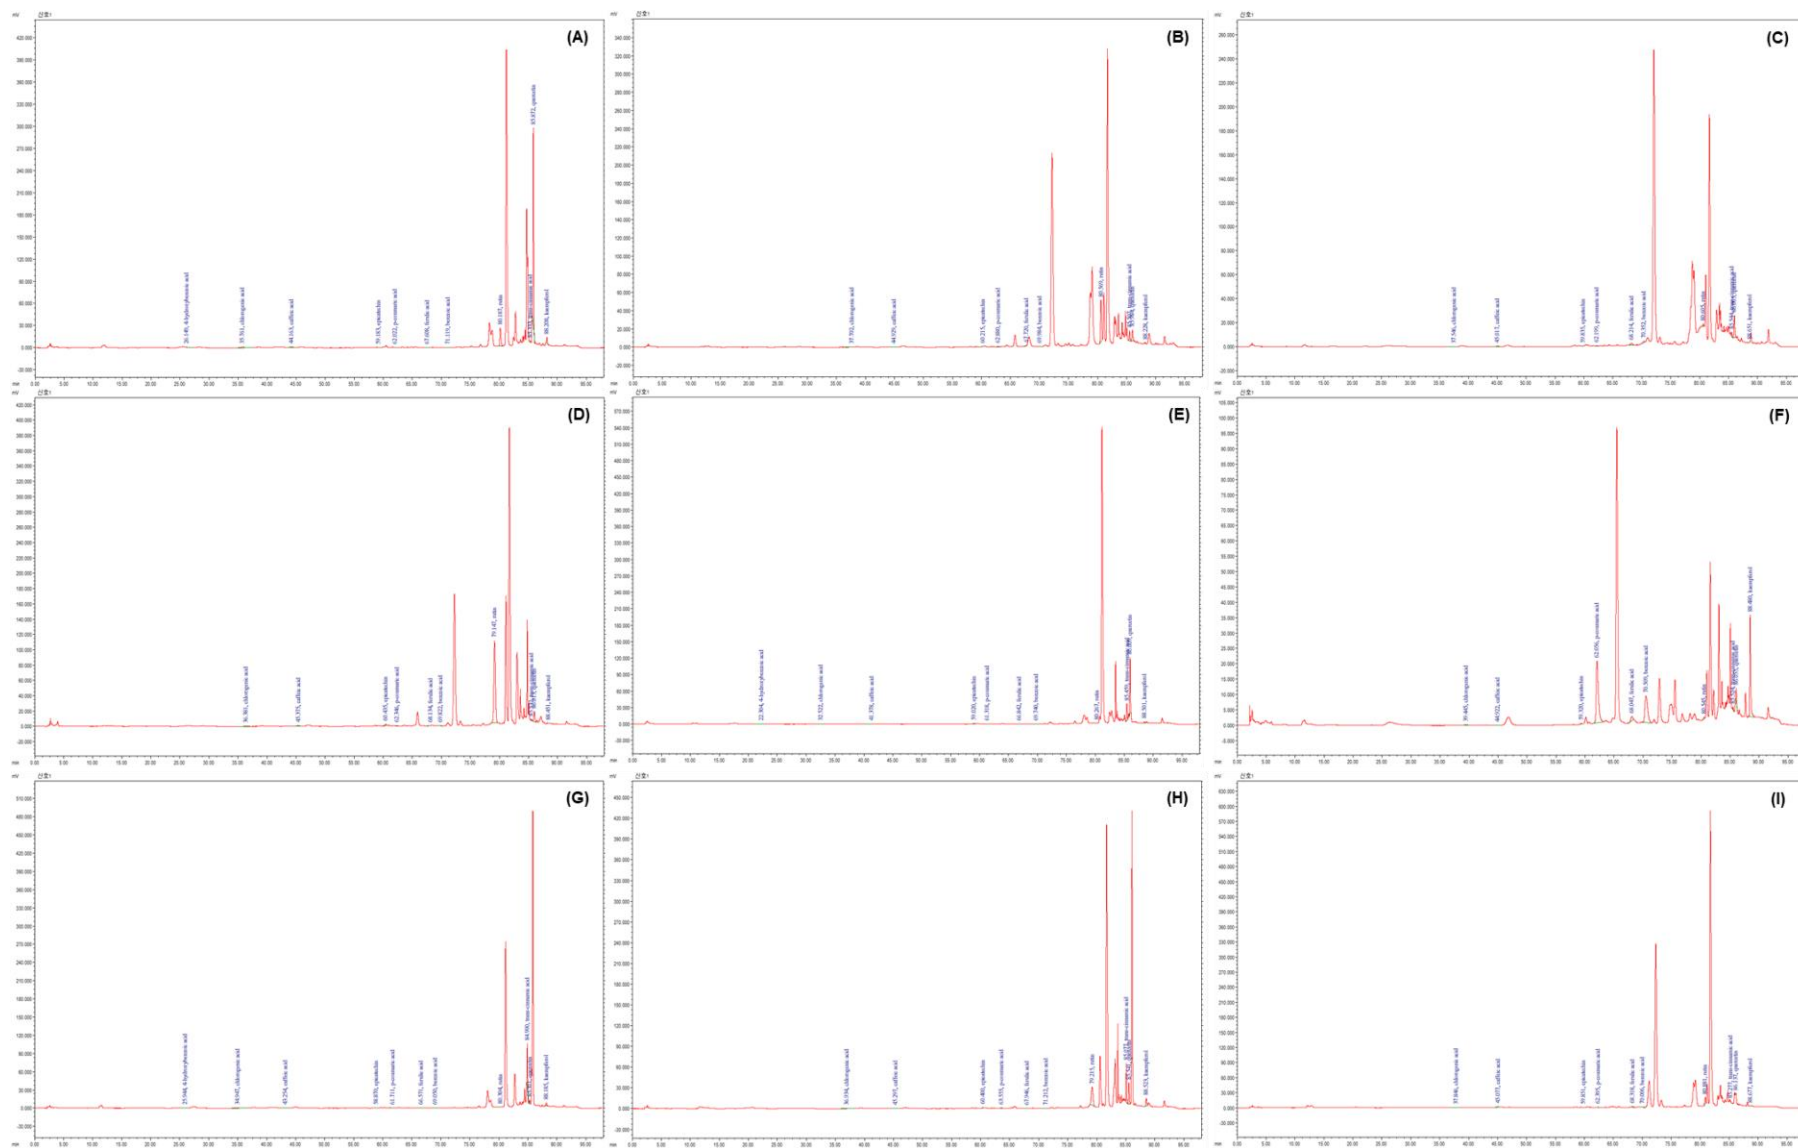



**Figure S5.** LC chromatogram of riboflavin in *Mentha* species. (A) Apple mint; (B) Chocolate mint; (C) Eau de cologne mint; (D) Horse mint; (E) Peppermint; (F) Pennyroyal mint; (G) Pineapple mint; (H) Spearmint; (I) Water mint. The Fluorescence excitation at 430 nm; fluorescence emission at 540 nm.

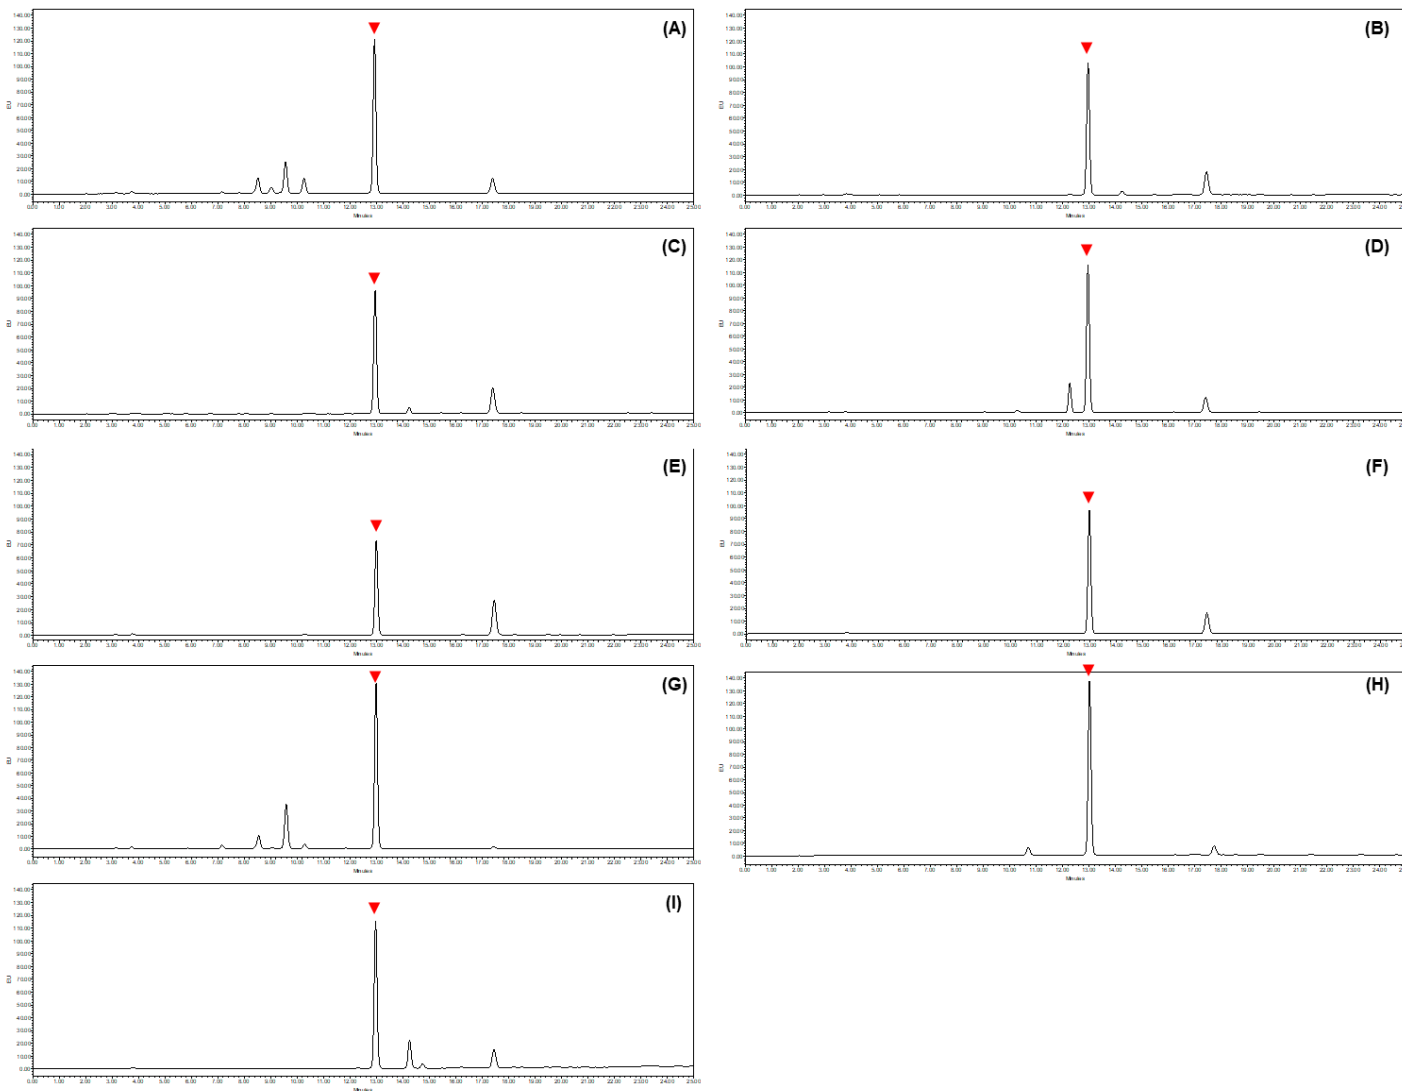

**Figure S6.** LC chromatogram of carotenoids in *Mentha* species. (A) Apple mint; (B) Chocolate mint; (C) Eau de cologne mint; (D) Horse mint; (E) Peppermint; (F) Pennyroyal mint; (G) Pineapple mint; (H) Spearmint; (I) Water mint. Peak: (1) Violaxanthin; (2) Antheraxanthin; (3) Lutein; (4) Zeaxanthin; (5) trans- $\beta$ -Apo-8'-carotenal (internal standard); (6) 13Z- $\beta$ -carotene; (7)  $\alpha$ -Carotene ; (8) E- $\beta$ -Carotene; (9) 9Z- $\beta$ -Carotene.

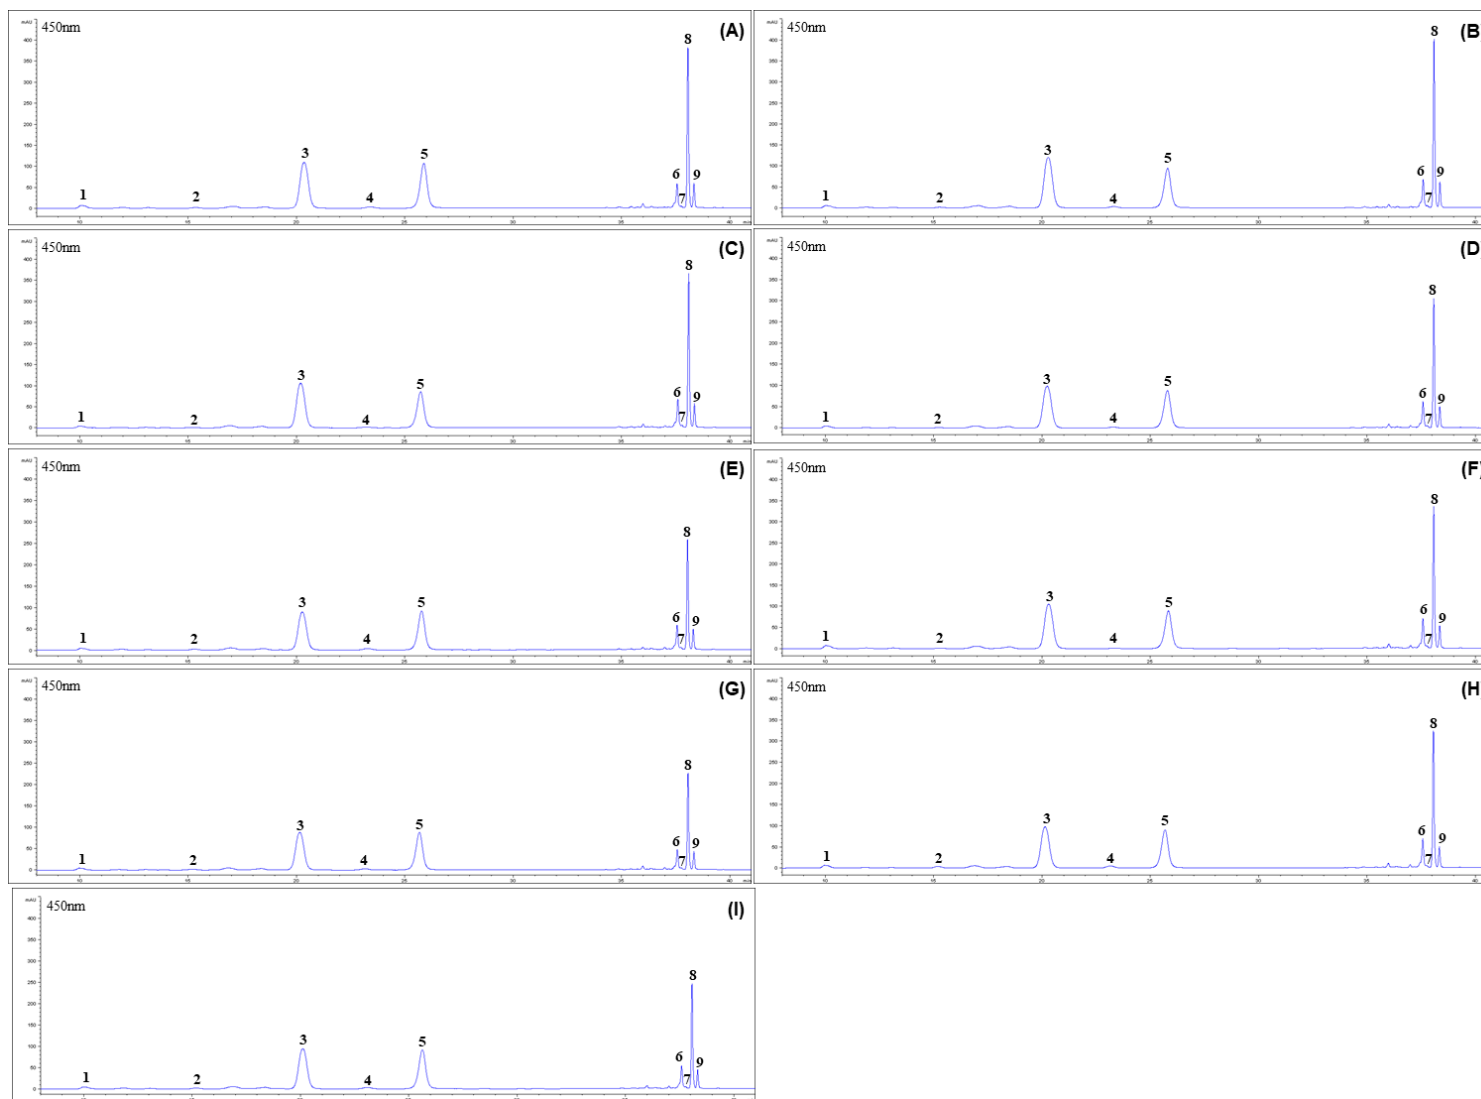

**Figure S7`.** Relationship between total carotenoid content and reducing power assay of *Mentha* species.

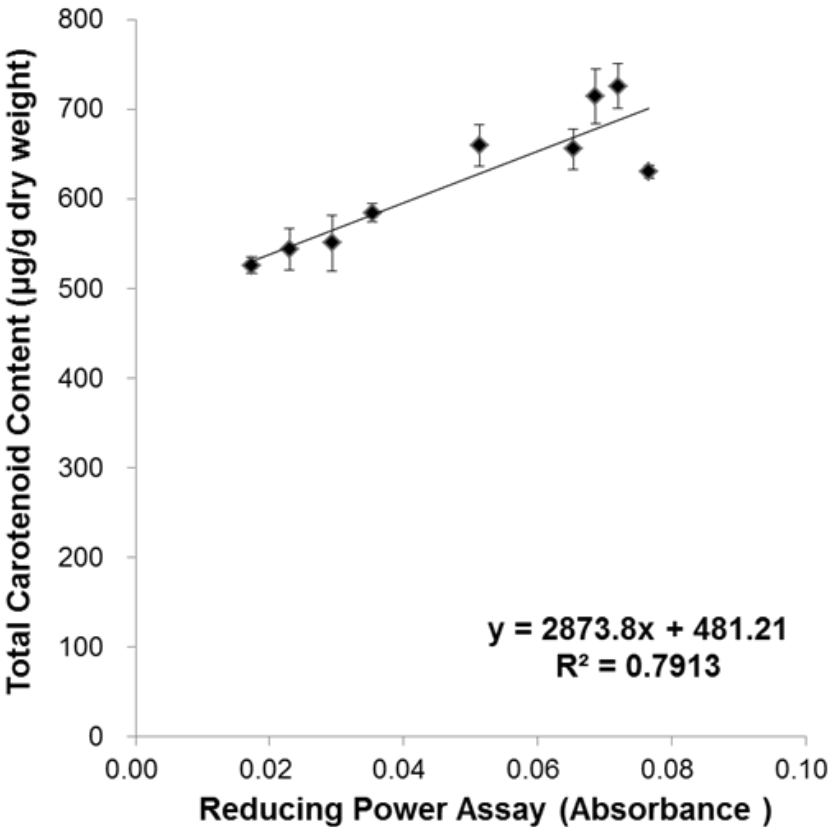

Supplement: molecules-24-00258-s001.pdf [file molecules-24-00258-s001.pdf]
